# Supplementary material for: Mixtures of Mycotoxins, Phytoestrogens, and Other Secondary Metabolites in Whole-Plant Corn Silages and Total Mixed Rations of Dairy Farms in Central and Northern Mexico
Source: MDPI journal article supplement (doi:10.3390/toxins15020153), 2023-02-13
Supplement: s1 [file s1]

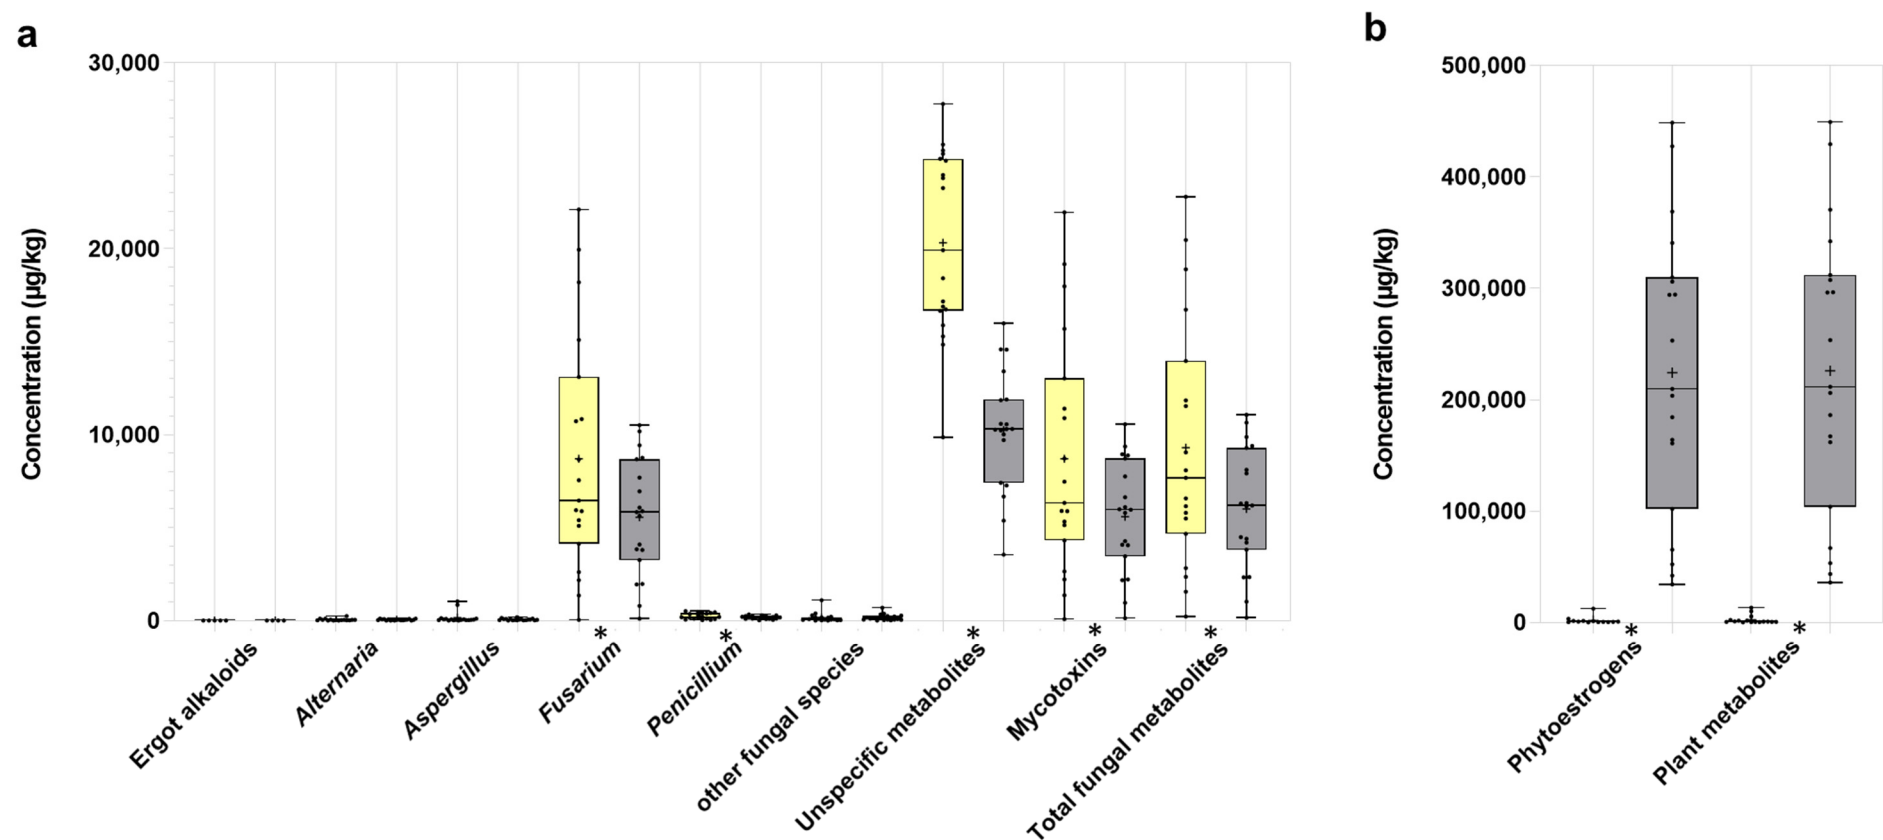

**Figure S1.** Distribution of concentration (µg/kg DM, linear scale) of (a) groups of fungal and unspecific metabolites, included accumulated mycotoxins and (b) total phytoestrogens and plant metabolites detected in whole-plant corn silages (yellow) and total mix rations (gray) in dairy farms in Mexico. Asterisks (\*) show significant differences ( $p$ -value < 0.05) between the concentration in the re-spective group in whole-plant corn silages and total mix rations according to the Wilcoxon matched-pairs signed rank test ( $p$ -values in Table 2). Means are shown as “+”.

**Table S1.** Description of the co-contamination level of the diverse groups of analysis detected in whole-plant corn silages and total mixed rations of Mexican dairy farms.

| Group of metabolites     | Whole-Plant Corn Silages ( <i>n</i> =19) |        |         | Total Mixed Rations ( <i>n</i> =19)   |        |         | Wilcoxon Matched Pairs Test <i>p</i> -value* |
|--------------------------|------------------------------------------|--------|---------|---------------------------------------|--------|---------|----------------------------------------------|
|                          | Co-Contamination (Metabolites/Sample)    |        |         | Co-Contamination (Metabolites/Sample) |        |         |                                              |
|                          | Average ± SD                             | Median | Range   | Average ± SD                          | Median | Range   |                                              |
| Ergot alkaloids          | 1 ± 0.5                                  | 1      | 1 - 2   | 1 ± 0.5                               | 1      | 1 - 2   | 0.5000                                       |
| <i>Alternaria</i>        | 3 ± 1.7                                  | 2      | 1 - 6   | 3 ± 1.6                               | 3      | 1 - 6   | 0.1624                                       |
| <i>Aspergillus</i>       | 2 ± 1.3                                  | 2      | 1 - 5   | 3 ± 1.6                               | 3      | 1 - 5   | 0.0034                                       |
| <i>Fusarium</i>          | 14 ± 5.1                                 | 15     | 4 - 20  | 18 ± 4.9                              | 20     | 5 - 24  | 0.0001                                       |
| <i>Penicillium</i>       | 4 ± 1.2                                  | 4      | 2 - 6   | 5 ± 1.4                               | 5      | 3 - 7   | <0.0001                                      |
| Other fungi              | 5 ± 1.3                                  | 4      | 3 - 7   | 5 ± 1.6                               | 5      | 2 - 9   | 0.1865                                       |
| Mycotoxins               | 17 ± 6.1                                 | 16     | 6 - 27  | 24 ± 5.6                              | 26     | 9 - 31  | <0.0001                                      |
| Total fungal metabolites | 27 ± 7.0                                 | 27     | 13 - 39 | 35 ± 7.8                              | 36     | 13 - 43 | <0.0001                                      |
| Phytoestrogens           | 4 ± 1.8                                  | 4      | 1 - 8   | 9 ± 0.7                               | 9      | 7 - 9   | <0.0001                                      |
| Plant metabolites        | 4 ± 2.4                                  | 3.5    | 1 - 9   | 9 ± 1.1                               | 9      | 7 - 12  | <0.0002                                      |
| Unspecific metabolites   | 9 ± 1.7                                  | 9      | 6 - 12  | 12 ± 2.0                              | 12     | 8 - 16  | <0.0001                                      |
| Total metabolites        | 29 ± 6.8                                 | 29     | 13 - 39 | 55 ± 8.9                              | 58     | 31 - 66 | <0.0001                                      |

\* Significant differences between each set of matched pairs presented *p*-value < 0.05.

**Table S2.** P-values of the Spearman's correlation coefficients ( $\rho$ ) among groups of metabolites detected in total mixed rations with the main dietary ingredients. Significantly different ( $p$ -value < 0.05) presented in black cells.

| Dietary Ingredients             | Groups of Metabolites |                   |                    |                 |                    |                      |                        |                       |           |           |             |            |                    |                   |
|---------------------------------|-----------------------|-------------------|--------------------|-----------------|--------------------|----------------------|------------------------|-----------------------|-----------|-----------|-------------|------------|--------------------|-------------------|
|                                 | Ergot alkaloids       | <i>Alternaria</i> | <i>Aspergillus</i> | <i>Fusarium</i> | <i>Penicillium</i> | Other fungal species | Unspecific metabolites | Type B trichothecenes | Fumonisin | Enniatins | Zearalenone | Mycotoxins | Fungal metabolites | Plant metabolites |
| Forage                          | 0.0038                | 0.6430            | 0.6586             | 0.5071          | 0.1645             | 0.9201               | 0.6482                 | 0.9700                | 0.2984    | 0.9614    | 0.4243      | 0.5071     | 0.4636             | 0.3339            |
| Concentrate                     | 0.0038                | 0.6430            | 0.6586             | 0.5071          | 0.1645             | 0.9201               | 0.6482                 | 0.9700                | 0.2984    | 0.9614    | 0.4243      | 0.5071     | 0.4636             | 0.3339            |
| Whole-plant corn silage         | 0.3456                | 0.1329            | 0.8752             | 0.6520          | 0.2807             | 0.4901               | 0.6807                 | 0.6557                | 0.9275    | 0.8426    | 0.9684      | 0.6728     | 0.6755             | 0.8109            |
| Alfalfa hay                     | 0.6490                | 0.3118            | 0.3686             | 0.9713          | 0.4074             | 0.0859               | 0.7513                 | 0.9613                | 0.1740    | 0.4986    | 0.9740      | 0.9857     | 0.9541             | 0.8998            |
| Alfalfa silage                  | 0.6227                | 0.7261            | 0.5984             | 0.4810          | 0.8611             | 0.8611               | 0.1489                 | 0.1487                | 0.1234    | 0.4800    | 0.4771      | 0.4810     | 0.4810             | 0.7261            |
| Corn stover                     | 0.2784                | 0.6961            | 0.7794             | 0.0173          | 0.6374             | 0.8337               | 0.6961                 | 0.3622                | 0.8180    | 0.8333    | 0.1450      | 0.0220     | 0.0305             | 0.3409            |
| Rolled corn                     | 0.8664                | 0.1551            | 0.6665             | 0.7640          | 1.0000             | 0.4620               | 0.5533                 | 0.8493                | 0.6701    | 0.2526    | 0.3747      | 0.8415     | 0.9045             | 0.6886            |
| Corn meal                       | 0.5531                | 0.3076            | 0.6980             | 0.5729          | 0.3695             | 0.8574               | 0.7190                 | 0.3273                | 0.8662    | 0.2833    | 0.9684      | 0.4345     | 0.4211             | 0.6122            |
| High-energy density concentrate | 0.5426                | 0.6755            | 0.3353             | 0.9684          | 0.8177             | 0.6492               | 0.9770                 | 0.2471                | 0.6767    | 0.1527    | 0.7024      | 0.9426     | 0.9828             | 0.6207            |
| Sorghum silage                  | 0.4728                | 0.8830            | 0.0196             | 0.1433          | 0.2291             | 0.8619               | 0.9254                 | 0.1826                | 0.0303    | 0.2336    | 0.0584      | 0.1828     | 0.2347             | 0.3084            |
| Protein-rich concentrate        | 0.4614                | 0.4771            | 0.5281             | 0.7395          | 0.6570             | 0.1582               | 0.8500                 | 0.1225                | 0.4581    | 0.5567    | 0.5182      | 0.6171     | 0.6370             | 0.7605            |
| Bakery by-product               | 0.6227                | 0.1014            | 0.7261             | 0.2858          | 0.3764             | 0.8611               | 0.7261                 | 0.8611                | 0.5982    | 0.2091    | 0.8599      | 0.2858     | 0.3764             | 0.2101            |
| Corn bran                       | 0.2351                | 0.1169            | 0.0856             | 0.7581          | 0.5452             | 0.5542               | 0.4338                 | 0.2577                | 0.9893    | 0.8828    | 0.2717      | 0.8514     | 0.7479             | 0.0913            |
| Brewery's spent grains          | 0.6227                | 0.2858            | 0.4810             | 0.7261          | 0.8611             | 0.2101               | 0.1014                 | 0.2856                | 0.1487    | 0.8608    | 0.4771      | 0.7261     | 0.8611             | 0.7261            |
| Oat hay                         | 0.3639                | 0.4942            | 0.3217             | 0.7064          | 0.7148             | 0.0331               | 0.2378                 | 0.8004                | 0.1143    | 0.0542    | 0.9503      | 0.6202     | 0.5537             | 0.0231            |

**Table S3.** List of 863 targeted metabolites to analyze whole-plant corn silages and total mixed rations from Mexican dairy farms via a validated multi-metabolite liquid chromatography/electrospray ionization-tandem mass spectrometry (LC/ESI-MS/MS).

|                              |                                  |                       |                             |
|------------------------------|----------------------------------|-----------------------|-----------------------------|
| 10-Norparvulenone            | Aflatoxin B1                     | Andrastin A           | Aspterric acid              |
| 15-Acetyldeoxynivalenol      | Aflatoxin B2                     | Andrastin B           | Aspulvinone E               |
| 15-Desoxyoxalicine B         | Aflatoxin G1                     | Andrastin C           | Aspulvinone O               |
| 15-Hydroxyculmorin           | Aflatoxin G2                     | Andrastin D           | Aspyrone                    |
| 15-Hydroxyculmoran           | Aflatoxin M1                     | Andrastin Derivative  | Asteltoxin                  |
| 16-Ketoaspergillimide        | Aflatoxin M2                     | Anisomycin            | Asterric acid               |
| 1-Deoxypebrolide             | Aflatoxin P1                     | Antibiotic L 696474   | Asterriquinonedimethylether |
| 2-Chlorunguinol              | Aflatoxin Q1                     | Antibiotic F 1849 A   | Aszonapyrone A              |
| 2-Methylmitorubin            | Aflatrem                         | Antibiotic PF 1052    | Atlantinon A                |
| 3,4,15Triacetylinalenol      | Aflavarin                        | Antibiotic Y          | Atpenin A5                  |
| 3,4-Diacetylinalenol         | Agistatin B                      | Apicidin              | Atropine                    |
| 3-Acetyldeoxynivalenol       | Agistatin D                      | Apidicin C            | Atroventinmethylether       |
| 3-Acetylneosolaniol          | Agistatin E                      | Apidicin D2           | Aurantiamin A               |
| 3-Acetyl-T-2 Toxin           | Agroclavine                      | Aristolochic acid A   | Auranticin A                |
| 3-Hydroxy-3-acetyl-T-2 Toxin | Aigualomycin D                   | Ascochlorin           | Auranticin A                |
| 3-Hydroxy-HT-2 Toxin         | AJ 296                           | Ascofuranone          | Aurantine                   |
| 3-Hydroxyterphenyllin        | Alamethicin                      | Ascolactone           | Aurantioclavin              |
| 3-Nitropropionic acid        | alpha-Zearalenol                 | Ascomycin             | Aurantiogliocladin          |
| 4,7,15Triacetylinalenol      | alpha-Zearalenol Glucoside       | Asparason A           | Aurasperon B                |
| 4-Hydroxyalternariol         | Alteichin                        | Aspercolorin          | Aurasperon C                |
| 4-Methoxycyclopeptin         | Altenuene                        | Asperflavine          | Aurasperon G                |
| 4-Monoacetoxyscirpenol       | Altenuisol                       | Asperfuran            | Aureobasidin                |
| 5-Hydroxyculmorin            | Altenusin                        | Aspergamid A          | Aurofusarin                 |
| 5-Methylmellein              | Alternarian acid                 | Aspergillicin Derivat | Austalide A                 |
| 7-Hydroxykaurenolide         | Alternarienoic acid              | Aspergillimide        | Austalide B                 |
| 7-Hydroxypestalotin          | Alternariol                      | Asperglaucide         | Austalide Derivative        |
| 8-Acetylneosolaniol          | Alternariol-3-Glucoside          | Asperlactone          | Austalide F                 |
| 8-O-Methylaverufin           | Alternariol-9-Glucoside          | Asperloxine A         | Austamide                   |
| A 23187                      | Alternariolmethylether           | Aspermytin A          | Austdiol                    |
| A 26771 B                    | Alternariolmethylether-Glucoside | Aspernigrin A         | Austinol                    |
| AAL TA-Toxin                 | Altersetin                       | Asperphenamate        | Austocystin A               |
| AAL TB Toxin                 | Altersolanol                     | Asperthecin           | Austocystin B               |
| AAL TD Toxin                 | Altertoxin II                    | Aspinolid B           | Austocystin D               |
| AAL TE Toxin                 | Altertoxin-I                     | Aspinonene            | Austocystin I               |
| Abscisic acid                | Amauromine                       | Aspochalasin C        | Australide D                |
| Acetylchaetoglobosin D       | Amidepsin B                      | Aspochalasin D        | Australide F                |
| Achaetolide Derivat          | Aminodimethyloctadecanol         | Aspochalasin H        | Averantin                   |
| Acuminatum B                 | Amoxycillin                      | Aspochalasin I        | Averantinmethylether        |
| Acuminatum C                 | Amphotericin                     | Aspochalasin J        | Averufanin                  |
| Aflatoxicol                  | Anacin                           | Aspochracin           | Averufin Derivat            |

**Table S3. Cont.**

|                           |                      |                            |                            |
|---------------------------|----------------------|----------------------------|----------------------------|
| Averufin                  | Cerulenin            | Colchicine                 | Deepoxy-deoxynivalenol     |
| Bacitracin                | Chaconin             | Communesin B               | Deepoxy-T-2 toxin          |
| Bafilomycin A1            | Chaetocin            | Cordycepin                 | Deepoxy-T-2tetraol         |
| Banksialactone A          | Chaetoglobosin A     | Coumestrol                 | Dehydroaustinol            |
| Barceloneic acid          | Chaetoglobosin C     | Culmorin                   | Dehydrocurvularin          |
| Bassianolide              | Chaetoglobosin D     | Curvularin                 | Dehydrocyclopeptine        |
| Beauvericin               | Chaetoglobosin F     | Curvulin                   | Dehydrogriseofulvin        |
| Benzomalvin A             | Chaetominine         | Cyclo(l-Ala-L-Pro)         | Demethoxyviridol           |
| Benzomalvin B             | Chaetoviridin A      | Cyclo(L-Leu-L-Pro)         | Demethylsteltoxin          |
| Benzomalvin C             | Chanoclavin          | Cyclo(L-Pro-L-Tyr)         | Demethylsulochrin          |
| Berkedrimane B            | Chetomin             | Cyclo(L-Pro-L-Val)         | DeoxyAltersolanol          |
| Berkeleyacetal B          | Chetoseminudin A     | Cycloaspeptide A           | Deoxybrevianamid E         |
| Berkeleylctone E          | Chevalone B          | Cycloechinulin             | Deoxyfusapyron             |
| Berkeleylctone F          | Chevalone C          | Cycloheximide              | Deoxygerfelin              |
| beta-Zearalenol           | Chevalone E          | Cyclopenin                 | Deoxynivalenol             |
| beta-Zearalenol-Glucoside | Chlamydosporidiol    | Cyclophenol                | Deoxynortryptoquivalin     |
| Bikaverin                 | Chlamydosporol       | Cyclopeptine               | Deoxytryptoquialanine      |
| Biochanin                 | Chloramphenicol      | Cyclopiazonsäure           | Deoxytryptoquivaline A     |
| Bis(methylthio)gliotoxin  | Chlorocitreorsein    | Cyclosporin A              | Desoxypaxillin             |
| Bongkrekic acid           | Chloronectrin        | Cyclosporin B              | Desoxyverrucosidin         |
| Botryodiplodin            | Chlortetracyclin     | Cyclosporin C              | Destruxin A                |
| Brasilamide A             | Chrodrimanin         | Cyclosporin D              | Destruxin B                |
| Brefeldin A               | Chromomycin A3       | Cyclosporin H              | Destruxin CHL              |
| Brevianamid F             | Chrysogin            | Cylindrocarpon A4          | Destruxin D                |
| Brevicompanine B          | Chrysophanol         | Cylindrol B                | Destruxin-Ed Derivat       |
| Butenolid                 | Cinereanin           | Cytochalasin A             | Dethiosecoemestrin         |
| Butyrolacton III          | Citreohybriddione    | Cytochalasin B             | Diacetoxyscirpenol         |
| Butyrolactone I           | Citreohybridinol     | Cytochalasin C             | Diacetylcercosporin        |
| Butyrolactone II          | Citreoindole         | Cytochalasin D             | Diacetylivalenol           |
| ButyrolactonIImethylether | Citreorsein          | Cytochalasin E             | Dichlordiaporin            |
| Byssochlamic acid         | Citreoviridin        | Cytochalasin J             | Dichlormethylasterric acid |
| Calonectrin               | Citreoviridin C      | Daidzein                   | Diffraitaic acid           |
| Calphostin                | Citreoviridinol      | Daidzin                    | Dihydroaspyrone            |
| Calphostin C              | Citrinin             | Daunorubicin               | Dihydrochlamydocin         |
| Calyxanthone              | Citromycetin         | Deacetylneosolaniol        | Dihydrocitrinone           |
| Carnequinazolin A         | Cladosporin          | Decalonectrin              | Dihydrocompactin           |
| Cephalochromin            | Cladosporone Derivat | Dechlorogriseofulvin       | Dihydroergosine            |
| Cercosporamide            | Clonostachydiol      | Dechlorogriseofulvin       | Dihydroergotamine          |
| Cercosporin               | CNM 115443           | Dechloroisochromophilon IV | Dihydrogriseofulvin        |
| Cereulide                 | Cochlioquinone A     | Dechloronormidulin         | Dihydroinfecopyron         |

**Table S3. Cont.**

|                         |                        |                          |                          |
|-------------------------|------------------------|--------------------------|--------------------------|
| Dihydrolysergol         | Ergocristinine         | Fumiquinazolin D         | Glisoprenin D            |
| Dihydrosterigmatocystin | Ergocryptine           | Fumiquinazolin Derivat   | Glyantrypine             |
| Dihydrotrichotetronine  | Ergocryptinine         | Fumiquinazolin F         | Glycitein                |
| Dihydroxycalonectrin    | Ergometrine            | Fumitremorgin A          | Glycitin                 |
| Dihydroxymellein        | Ergometrinine          | Fumitremorgin B          | Grayanotoxin I           |
| DihydroxyZONMethylether | Ergosin                | Fumitremorgin C          | Griseofulvin acid        |
| Dinactin                | Ergosinin              | Fumonisin A1             | Griseofulvin             |
| Diplodiatoxin           | Ergotamine             | Fumonisin A1 (precursor) | Griseophenone A          |
| DON-3-glucoside         | Ergotaminine           | Fumonisin A2             | Griseophenone B          |
| Doxorubicin             | Ergovalin              | Fumonisin AK2            | Griseophenone C          |
| Doxycyclin              | Erucifolin             | Fumonisin B1             | Harzianopyridine         |
| Drimane 6               | Erucifolin-N-Oxid      | Fumonisin B2             | Harzianum A              |
| Drimane 8               | Erythromycin           | Fumonisin B3             | HC Toxin                 |
| Duclauxin               | Ethylorsellinic acid   | Fumonisin B4             | Heliotrin                |
| Echimidin               | Europin                | Fumonisin B6             | Heliotrin-N-Oxid         |
| Elymoclavine            | Europin-N-Oxid         | Fungerin                 | Helvolic acid            |
| Elymoclavine-Fructoside | Expansolid             | Fusaproliferin           | Helvolinic acid          |
| Emericellamide A        | F01 1358-A             | Fusapyron                | Heptaibin                |
| Emericellamide C        | Fallacinol             | Fusarenon-X              | Heptelidic acid          |
| Emericellamide E        | FB1 Methylester        | Fusaric acid             | Herquiline A             |
| Emestrin                | Fellutanine A          | Fusarielin A             | Hexaacetyl-HFB1          |
| Emindole SA             | Fellutannine B         | Fusarin C                | Hirsutide                |
| Emodin                  | Festuclavine           | Fusarinolic acid         | HT-2 Glucoside           |
| Endocrocin              | Filipin                | Fusarisetin A            | HT-2 toxin               |
| Enniatin A              | FK 506                 | Fuscofusarin             | hydrolysed Fumonisin B1  |
| Enniatin A1             | FK 9775 A              | Galbinic acid            | hydrolysed Nidulin       |
| Enniatin B              | FK 9775 B              | Geldanamycin             | Hydroxyandrastin A       |
| Enniatin B1             | Flavipucin             | Genistein                | Hydroxyandrastin C       |
| Enniatin B2             | Flavoglaucin           | Genistin                 | Hydroxycarnequinazolin A |
| Enniatin B3             | Folipastin             | Geodin                   | Hydroxycurvularin        |
| Epiequisetin            | Fonsecin               | Geodin hydrate           | Hydroxypaspaline         |
| Epoxyagroclavin         | Formonetin             | Gibberellic acid         | Hydroxysulchorin         |
| Epoxyctochalsin C       | FS-4                   | Gibberellin A12          | Hydroxysydonic acid      |
| Equisetin               | Fulvic acid            | Gibberellin A14          | Hyoscin                  |
| Eremofortin A           | Fumagillin             | Gibberellin A4           | Hypothemycin             |
| Eremofortin B           | Fumarprotocetatic acid | Gibberellin A7           | Illicolin A              |
| Ergine                  | Fumifungin             | Gibepyrone D             | Illicolin B              |
| Ergocornine             | Fumigaclavine C        | Gigantenone              | Illicolin C              |
| Ergocorninin            | Fumigaclavine          | Gliocladic acid          | Illicolin E              |
| Ergocristine            | Fumiquinazolin A       | Gliotoxin                | Illicolin F              |

**Table S3. Cont.**

|                           |                         |                         |                          |
|---------------------------|-------------------------|-------------------------|--------------------------|
| Ilicicolin H              | Linamarin               | Monocrotalin-N-Oxid     | Ochrephilone             |
| Indicin_IM_LA             | Lincomycin              | Monomethylcurvulin      | Okaramine B              |
| Indicin_IM_LA-N-Oxid      | LL-Z 1272e              | MPA Derivative          | Okaramine D              |
| Infectopyron              | LLZ 1640-2              | Mycophenolic acid IV    | Oligomycin A             |
| Integracin A              | LLZ 1640-4              | Mycophenolic acid       | Oligomycin B             |
| Integracin B              | Lolitrem B              | Myriocin                | O-Methylsterigmatocystin |
| Ionomycin                 | Lolitrem N              | Mytoxin C               | O-Methylviridicatin      |
| Irgasan                   | Lotaustralin            | N-0352A                 | Ononin                   |
| Isocereulide A            | Luteoskyrin             | N-0532B                 | Ophiobolin A             |
| Isochromophilon III       | Luteusin A              | N-Acetyl-HFB1           | Ophiobolin B             |
| Isochromophilon IV        | Lysergol                | N-Benzoyl-Phenylalanine | Orsellinic acid          |
| Isochromophilon IX        | Macrosphelide A         | Neoechinulin A          | Oxalicine B              |
| Isochromophilone VI       | Macrosporin             | Neosartorin             | Oxaline                  |
| Isofusidienol             | Malformin A             | Neosolaniol             | Oxidized Elymoclavine    |
| Isokotanin B              | Malformin A2            | Neoxaline               | Oxidized Luol            |
| Isopenicillide Derivative | Malformin C             | NG 012                  | Oxisterigmatocystin E    |
| Iso-Rhodoptilometrin      | Marcfortine A           | Nidulin                 | Oxyskyrin                |
| Isosulochrin              | Marcfortine C           | Nidurufin               | Papyracillic acid A      |
| Jacobin                   | Meleagrin               | Nigericin               | Paracelsin A             |
| Jacobin-N-Oxid            | Meleagrin Derivative    | Nigragillin             | Paracelsin B             |
| Janthitrem A              | MER-NF5003E             | Nigrosporoate A         | Paraherquamide A         |
| Josamycin                 | MER-NF5003F             | Nivalenol Glucoside     | Paraherquamide E         |
| K252a                     | Methoxycurvularin       | Nivalenol               | Paspalic acid            |
| K252b                     | Methoxysterigmatocystin | Nocardamine             | Paspalin                 |
| K-76 Derivative 4         | Methylasteric acid      | Nonactin                | Paspalinin               |
| Kipukasin A               | Methylequisetin         | Norcitreoviridin        | Paspalitrem A            |
| Kipukasin B               | Methylfunicone          | Norlichexanthone        | Paspalitrem B            |
| Kipukasin D               | Methylorsellinic acid   | Nornidulin              | Patulin                  |
| KO 143                    | Methylsulochrin         | Norsolorinic acid       | Paxillin                 |
| Kojic acid                | Mevastatin              | Norstictic acid         | Pencillazaphilone B      |
| Koninginin A              | Mevinolin               | Nortryptoquialanine     | Penicillic acid          |
| Koninginin B              | Mithramycin C           | Norverrucosidin         | Penicillide              |
| Koninginin D              | Mitomycin               | Notoamide Derivative    | Penicillin G             |
| Koninginin E              | Mitorubinic acid        | Notoamide E Derivat     | Penicillin V             |
| Kotanin A                 | Mollicellin D           | NT-2 Toxin              | Penicinoline             |
| Kumbicin C                | Monactin                | Obscurolide A1          | Penicolinate             |
| Lasiocarpin               | Moniliformin            | Ochratoxin A            | Penigequinolone A        |
| Lasiocarpin-N-Oxid        | Monoacetoxyscirpenol    | Ochratoxin alpha        | Peniprequinolone         |
| Lecanoric acid            | Monocerin               | Ochratoxin B            | Penitrem A               |
| Leoidin                   | Monocrotalin            | Ochratoxin C            | Pennigritrem A           |

**Table S3. Cont.**

|                         |                 |                                 |                          |
|-------------------------|-----------------|---------------------------------|--------------------------|
| Pentahydroxyscirpenol   | Quinadoline A   | Sclerotiorin                    | Sydowinin A              |
| Pentoxyfylline          | Quinadoline B   | Secalonic acid B                | Sydowinin B              |
| Pestalone               | Quinolactacin A | Secalonic acid D                | sydowinol                |
| Pestalotin              | Quinolactacin B | Secalonic acid F                | T-2 Glucoside            |
| Petromurin C            | Quinolone A     | Secoemestrin C Derivat          | T-2 toxin                |
| PF 1163 A               | Radicol         | seco-Sterigmatocystin           | T2-Tetraol               |
| Phaseolinone            | Radycinin       | semi Xanthomegnin               | T2-Triol                 |
| Phenopyrrozin           | Radicol         | semi-Vioxanthin                 | Tanzawaic acid B         |
| Phenylpyropene A        | Radclonic acid  | Senecionin_Senecivernin         | Taxol                    |
| Phomalone               | Rapamycin       | Senecionin_Senecivernin_N-Oxid  | Tenellin                 |
| Phomopsidin             | Rasfonin        | Seneciphylline                  | Tensidol B               |
| Phomopsin A             | Retrorsin       | Seneciphylline-N-Oxide          | Tentoxin                 |
| Phomopsolide B          | Roquefortine C  | Senkirkin                       | Tenuazonic acid          |
| Phomoxanthone A         | Roquefortine D  | Setusosin                       | Ternatin                 |
| Phthalexin              | Roquefortine E  | Siccanin                        | Terpendole C             |
| p-Hydroxyphenopyrrozin  | Roridin A       | Siccanol                        | Terpendole E             |
| Physcion                | Roridin L2      | Sissotrine                      | Terpendole I             |
| Pinselín                | Roritoxin C     | Skyrin                          | Terphenyllin             |
| Piscarinin A            | Rorotoxin A     | S-MethylDON                     | Terragine E              |
| Porritoxinol            | Rosellichalasin | Sorbicillacton A                | Terrecyclic acid         |
| Prehelinthosporol       | Rubellin D      | Sphingofungin B                 | Terrein                  |
| Prehelinthosporollacton | Rubratoxin A    | Sphingofungin D                 | Terretinin               |
| Prelaplin               | Rubrofusarin    | Spiculisporic acid              | Terretinin F Derivat     |
| Preussin                | Rugulosin       | Spiramycin                      | Territrem A              |
| Pseurotin A             | Rugulotrosin    | Spirodihydrobenzofuranlactam IV | Territrem B              |
| Puberulin A             | Rugulovasine A  | Sporidesmolide II               | Tetraacetlnivalenol      |
| Puromycin               | Rugulusovine    | Sporogen AO I                   | Tetraacetyl-T-2 Tetraol  |
| Purpactin A             | Salazinic acid  | Stachybotryamide                | Tetracycline             |
| Purpuride               | Sambucinol      | Stachybotrylactam               | Tetrahydrobostrycin      |
| Pyranonigrin            | Sartorypron     | Stachybotrysin B                | Thailandolide B          |
| Pyrenocin A             | Sartorypyrone B | Staurosporin                    | Thaxtomin A              |
| Pyrenophorol            | Satratoxin F    | Stemphylperyleneol              | Thielavin B              |
| Pyripyropene A          | Satratoxin G    | Sterigmatocystin                | Toxoflavin               |
| Pyripyropene B          | Satratoxin H    | Sticic acid                     | Triacetoxyscirpenol      |
| Pyripyropene D          | Scalusamid A    | Strobilactone A                 | Triacetyl-Deoxynivalenol |
| Pyrophén                | Sch 725680      | Sulochrin                       | Trichalasin B            |
| Quadrone                | Scirpentriol    | Surfactin A                     | Trichodermamide C        |
| Questiomycine A         | Sclerotigenin   | Surfactin B                     | Trichodermin             |
| Questiomycine Derivat   | Sclerotin A     | Sydonic acid                    | Trichodesmin             |
| Questiomycine           | Sclerotioramin  | Sydonol                         | Trichodimerol            |

**Table S3. Cont.**

|                          |                                |                          |            |
|--------------------------|--------------------------------|--------------------------|------------|
| Trichostatin A           | Ustiloxin B                    | Violaceol II             | Zinndiol   |
| Trichotetronine          | Ustiloxin D                    | Viomellein               | Zinniamide |
| Trichothecin             | Ustusol A                      | Vioxanthin               | Zinniol    |
| Trichothecolone          | Valinomycin                    | Viridicatin              |            |
| Trichoverrin A           | Vancomycin                     | Viridicatol              |            |
| Trypacidin               | Vermistatin                    | Viridicatum toxin        |            |
| Tryprostatin A           | Verrucarín A                   | Viriditoxin              |            |
| Tryprostatin B           | Verrucarín J                   | Viridol                  |            |
| Tryptophol               | Verrucarol                     | Vulpinic acid            |            |
| Tryptoquialanine         | Verrucofortune                 | W493                     |            |
| Tryptoquialanine Derivat | Verrucosidin                   | WIN 68577                |            |
| Tryptoquivaline A        | Verruculogen                   | WIN-64821                |            |
| Tryptoquivaline F        | Verruculotoxin                 | Wortmannin               |            |
| Tryptoquivaline G        | Versicolorin A                 | Xanthomegnin             |            |
| Tylosin                  | Versicolorin C                 | Xanthotoxin              |            |
| Ulocladol                | Versiconal Acetat (Hemiacetal) | Xantocillin X1           |            |
| Unguinol                 | Versiconol                     | Yaequinolone J2          |            |
| Unugisin E               | Verticillin A                  | Zearalenone              |            |
| Usnic acid               | Violaceic acid                 | Zearalenone-14-glucoside |            |
| Ustiloxin A              | Violaceol I                    | Zearalenone-16-Glucoside |            |

**Table S4.** Performance values of liquid chromatography/electrospray ionization tandem mass spectrometry (LC/ESI–MS/MS) analysis for mycotoxins, phytoestrogens, other fungal, plant and unspecific metabolites detected in whole-plant corn silage and total mixed rations of dairy cattle in Mexico.

| Metabolite              | Apparent Recovery (%) | Recovery of Extraction (%) | LOD (µg/kg) | LOQ (µg/kg) |
|-------------------------|-----------------------|----------------------------|-------------|-------------|
| 15-Acetyldeoxynivalenol | 60                    | 92                         | 15.0        | 50.0        |
| 15-Hydroxyculmorin      | 77                    | 85                         | 3.00        | 10.0        |
| 3-Nitropropionic acid   | 41                    | 86                         | 11.0        | 37.0        |
| 7-Hydroxypestalotin     | 78                    | 93                         | 1.60        | 5.20        |
| Abscisic acid           | 57                    | 87                         | 2.20        | 7.20        |
| Acuminatum B            | 86                    | 82                         | 0.70        | 2.50        |
| Altenuisol              | 100                   | 100                        | 1.50        | 5.00        |
| Alternariol             | 45                    | 94                         | 3.40        | 11.0        |
| Alternariolmethylether  | 52                    | 67                         | 3.30        | 11.0        |
| Altersetin              | 210                   | 98                         | 0.70        | 2.50        |
| Anisodamine             | 25                    | 97                         | 21.0        | 69.0        |
| Antibiotic Y            | 95                    | 88                         | 5.70        | 19.00       |
| Apicidin                | 65                    | 69                         | 0.50        | 1.50        |
| Ascochlorin             | 42                    | 95                         | 2.30        | 7.50        |
| Ascofuranone            | 41                    | 95                         | 0.80        | 2.70        |
| Asperglaucide           | 83                    | 99                         | 1.20        | 4.10        |
| Asperphenamate          | 75                    | 88                         | 0.10        | 0.40        |
| Asterric acid           | 136                   | 98                         | 7.20        | 25.0        |
| Atropine                | 66                    | 94                         | 8.90        | 30.0        |
| Aurofusarin             | 75                    | 100                        | 2.00        | 6.00        |
| Averufin                | 50                    | 100                        | 1.80        | 5.90        |
| Bassianolide            | 58                    | 99                         | 1.60        | 5.40        |
| Beauvericin             | 100                   | 95                         | 0.30        | 0.90        |
| Beauvericin A           | 100                   | 95                         | 0.30        | 0.90        |
| Beauveriolide I_III     | 75                    | 100                        | 1.00        | 3.00        |
| Bikaverin               | 52                    | 63                         | 0.50        | 1.70        |
| Bilaid A                | 75                    | 100                        | 1.00        | 3.00        |
| Biochanin               | 47                    | 92                         | 5.00        | 15.0        |
| Brevianamid F           | 49                    | 81                         | 2.40        | 8.10        |
| Cercosporin             | 45                    | 90                         | 2.90        | 9.60        |
| Chanoclavin             | 52                    | 94                         | 0.60        | 1.90        |
| Chrysogin               | 92                    | 97                         | 0.70        | 2.40        |
| Chrysophanol            | 47                    | 91                         | 38.0        | 125         |
| Citreorosein            | 33                    | 97                         | 2.00        | 6.60        |
| Citreoviridin           | 72                    | 100                        | 2.30        | 7.50        |
| Citrinin                | 82                    | 62                         | 6.00        | 21.0        |
| Citrinin                | 82                    | 62                         | 6.00        | 21.0        |

**Table S4. Cont.**

| <b>Metabolite</b>     | <b>Apparent<br/>Recovery<br/>(%)</b> | <b>Recovery of<br/>Extraction<br/>(%)</b> | <b>LOD<br/>(µg/kg)</b> | <b>LOQ<br/>(µg/kg)</b> |
|-----------------------|--------------------------------------|-------------------------------------------|------------------------|------------------------|
| Coumestrol            | 100                                  | 100                                       | 5.00                   | 15.0                   |
| Culmorin              | 72                                   | 91                                        | 100                    | 300                    |
| cyclo(L-Pro-L-Tyr)    | 61                                   | 64                                        | 15.0                   | 52.0                   |
| cyclo(L-Pro-L-Val)    | 53                                   | 85                                        | 1.40                   | 4.60                   |
| Cycloaspeptide A      | 49                                   | 100                                       | 1.20                   | 4.00                   |
| Cyclophenin           | 58                                   | 100                                       | 1.70                   | 5.70                   |
| Cytochalasin H        | 66                                   | 92                                        | 2.50                   | 8.20                   |
| Cytochalasin J        | 50                                   | 95                                        | 2.80                   | 9.30                   |
| Daidzein              | 42                                   | 96                                        | 53.0                   | 178                    |
| Daidzin               | 43                                   | 93                                        | 54.0                   | 181                    |
| Deoxyfusapyron        | 68                                   | 94                                        | 1.10                   | 3.40                   |
| Deoxygerfelin         | 75                                   | 100                                       | 0.20                   | 0.60                   |
| Deoxynivalenol        | 83                                   | 95                                        | 3.60                   | 12.0                   |
| Destruxin B           | 51                                   | 96                                        | 0.40                   | 1.40                   |
| Dihydroergosine       | 56                                   | 63                                        | 0.02                   | 0.07                   |
| DON-3-glucoside       | 100                                  | 87                                        | 12.0                   | 39.0                   |
| Emodin                | 71                                   | 94                                        | 2.10                   | 7.00                   |
| Enniatin A            | 80                                   | 89                                        | 0.10                   | 0.40                   |
| Enniatin A1           | 93                                   | 91                                        | 0.20                   | 0.80                   |
| Enniatin B            | 71                                   | 76                                        | 0.90                   | 2.80                   |
| Enniatin B1           | 51                                   | 49                                        | 0.60                   | 2.90                   |
| Enniatin B2           | 103                                  | 82                                        | 0.05                   | 0.20                   |
| Epiequisetin          | 138                                  | 94                                        | 1.00                   | 3.20                   |
| Equisetin             | 138                                  | 94                                        | 1.00                   | 3.20                   |
| Fellutanine A         | 83                                   | 87                                        | 1.30                   | 4.20                   |
| Festoclavine          | 57                                   | 97                                        | 0.60                   | 1.90                   |
| Flavoglaucin          | 47                                   | 92                                        | 0.40                   | 1.30                   |
| Fumigaclavine C       | 69                                   | 97                                        | 3.30                   | 10.0                   |
| Fumiquinazolin D      | 53                                   | 96                                        | 1.00                   | 3.20                   |
| Fumonisin A1 Vorstufe | 126                                  | 82                                        | 2.10                   | 7.10                   |
| Fumonisin A2          | 106                                  | 87                                        | 11.0                   | 36.0                   |
| Fumonisin B1          | 119                                  | 88                                        | 16.0                   | 53.0                   |
| Fumonisin B2          | 106                                  | 87                                        | 11.0                   | 36.0                   |
| Fumonisin B3          | 111                                  | 94                                        | 16.0                   | 53.0                   |
| Fumonisin B4          | 106                                  | 87                                        | 11.0                   | 36.0                   |
| Fungerin              | 72                                   | 90                                        | 0.30                   | 1.40                   |
| Fusaproliferin        | 100                                  | 100                                       | 10.0                   | 30.0                   |
| Fusapyron             | 88                                   | 97                                        | 0.90                   | 3.00                   |
| Fusaric acid          | 100                                  | 100                                       | 10.0                   | 30.0                   |
| Genistein             | 62                                   | 92                                        | 28.0                   | 93.0                   |

**Table S4. Cont.**

| <b>Metabolite</b>       | <b>Apparent<br/>Recovery<br/>(%)</b> | <b>Recovery of<br/>Extraction<br/>(%)</b> | <b>LOD<br/>(µg/kg)</b> | <b>LOQ<br/>(µg/kg)</b> |
|-------------------------|--------------------------------------|-------------------------------------------|------------------------|------------------------|
| Genistin                | 34                                   | 97                                        | 66.0                   | 220                    |
| Glycitein               | 59                                   | 103                                       | 32.0                   | 105                    |
| Glycitin                | 57                                   | 95                                        | 25.0                   | 82.0                   |
| Hydrolysed Fumonisin B1 | 118                                  | 89                                        | 2.30                   | 7.20                   |
| Hyoscine                | 64                                   | 90                                        | 10.0                   | 30.0                   |
| Illicolin A             | 46                                   | 71                                        | 1.00                   | 3.20                   |
| Illicolin B             | 36                                   | 99                                        | 2.70                   | 8.90                   |
| Illicolin E             | 51                                   | 95                                        | 1.00                   | 3.40                   |
| Infectopyron            | 69                                   | 86                                        | 2.00                   | 6.70                   |
| Iso-Rhodoptilometrin    | 58                                   | 95                                        | 0.60                   | 2.80                   |
| Kojic acid              | 58                                   | 89                                        | 87.0                   | 290                    |
| Kotanin A               | 55                                   | 99                                        | 1.50                   | 5.00                   |
| Macrosporin             | 58                                   | 98                                        | 2.20                   | 7.50                   |
| Methylsulochrin         | 52                                   | 95                                        | 2.70                   | 9.00                   |
| Moniliformin            | 97                                   | 69                                        | 5.30                   | 18.0                   |
| Monocerin               | 67                                   | 99                                        | 1.30                   | 4.20                   |
| Mycophenolic acid       | 88                                   | 98                                        | 4.30                   | 14.0                   |
| Mycophenolic acid IV    | 84                                   | 94                                        | 0.40                   | 1.20                   |
| Mycousnine              | 75                                   | 100                                       | 0.50                   | 1.50                   |
| Myriocin                | 55                                   | 66                                        | 0.30                   | 0.90                   |
| N-Benzoyl-Phenylalanine | 87                                   | 99                                        | 2.00                   | 6.50                   |
| Neoechinulin A          | 38                                   | 114                                       | 4.30                   | 14.0                   |
| Nivalenol               | 74                                   | 96                                        | 1.10                   | 3.60                   |
| Nonactin                | 87                                   | 96                                        | 0.20                   | 0.50                   |
| Norlichexanthone        | 42                                   | 96                                        | 1.10                   | 3.80                   |
| NP 1243                 | 178                                  | 99                                        | 3.40                   | 11.0                   |
| Ononin                  | 53                                   | 95                                        | 28.0                   | 92.0                   |
| Oxaline                 | 101                                  | 100                                       | 1.70                   | 5.10                   |
| Pestalotin              | 79                                   | 99                                        | 2.00                   | 6.60                   |
| PF 1163A                | 100                                  | 100                                       | 0.50                   | 1.50                   |
| Phenopyrrozin           | 111                                  | 91                                        | 0.80                   | 2.60                   |
| Phomalone               | 57                                   | 90                                        | 1.60                   | 5.40                   |
| Questiomyacin           | 100                                  | 100                                       | 1.00                   | 3.00                   |
| Questiomyacin Derivat   | 100                                  | 100                                       | 1.00                   | 3.00                   |
| Quinolactacin A         | 63                                   | 84                                        | 0.70                   | 2.40                   |
| Rugulusovine            | 56                                   | 94                                        | 1.00                   | 3.20                   |
| Sambutoxin              | 100                                  | 100                                       | 0.20                   | 0.60                   |
| seco-Sterigmatocystin   | 62                                   | 87                                        | 0.40                   | 1.30                   |
| Siccanol                | 111                                  | 95                                        | 7.00                   | 23.0                   |
| Skyrin                  | 84                                   | 96                                        | 0.30                   | 1.10                   |

**Table S4.** Cont.

| <b>Metabolite</b>  | <b>Apparent<br/>Recovery<br/>(%)</b> | <b>Recovery of<br/>Extraction<br/>(%)</b> | <b>LOD<br/>(µg/kg)</b> | <b>LOQ<br/>(µg/kg)</b> |
|--------------------|--------------------------------------|-------------------------------------------|------------------------|------------------------|
| Sporidesmolide II  | 100                                  | 100                                       | 0.50                   | 1.50                   |
| Sporidesmolide III | 100                                  | 100                                       | 0.50                   | 1.50                   |
| Sterigmatocystin   | 57                                   | 89                                        | 1.60                   | 5.30                   |
| Tentoxin           | 75                                   | 94                                        | 0.70                   | 2.30                   |
| Tenuazonic acid    | 150                                  | 100                                       | 10.0                   | 30.0                   |
| Ternatin           | 75                                   | 92                                        | 0.50                   | 1.70                   |
| Ternatin           | 75                                   | 92                                        | 0.50                   | 1.70                   |
| Tryptophol         | 30                                   | 99                                        | 100                    | 340                    |
| Versicolorin C     | 33                                   | 93                                        | 2.30                   | 7.50                   |
| W493               | 195                                  | 98                                        | 2.10                   | 7.10                   |
| Zearalenone        | 70                                   | 91                                        | 2.80                   | 9.20                   |
